# Supplementary material for: Microarray-Based RNA Profiling of Breast Cancer: Batch Effect Removal Improves Cross-Platform Consistency
Source: PubMed Central journal article supplement (PMC4101981; doi:10.1155/2014/651751), 2014-07-03

**Figure S1.** Heatmap visualizing the PAM50 genes on the Agilent dataset. Color coding represents PAM50 subtype classification results: Red: Basal; Yellow: HER2-enriched; Green: Luminal-A; Blue: Luminal-B; Purple: Normal-like.

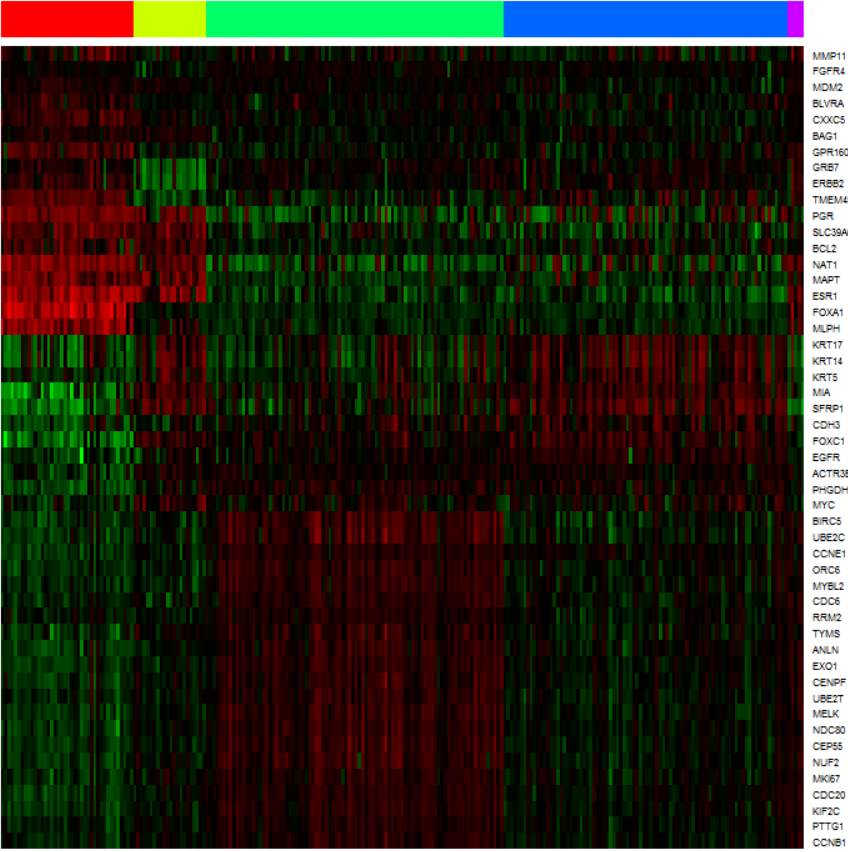

**Figure S2.** Heatmap visualizing the PAM50 genes on the 29K unadjusted dataset. Color coding represents PAM50 subtype classification results: Red: Basal; Yellow: HER2-enriched; Green: Luminal-A; Blue: Luminal-B; Purple: Normal-like.

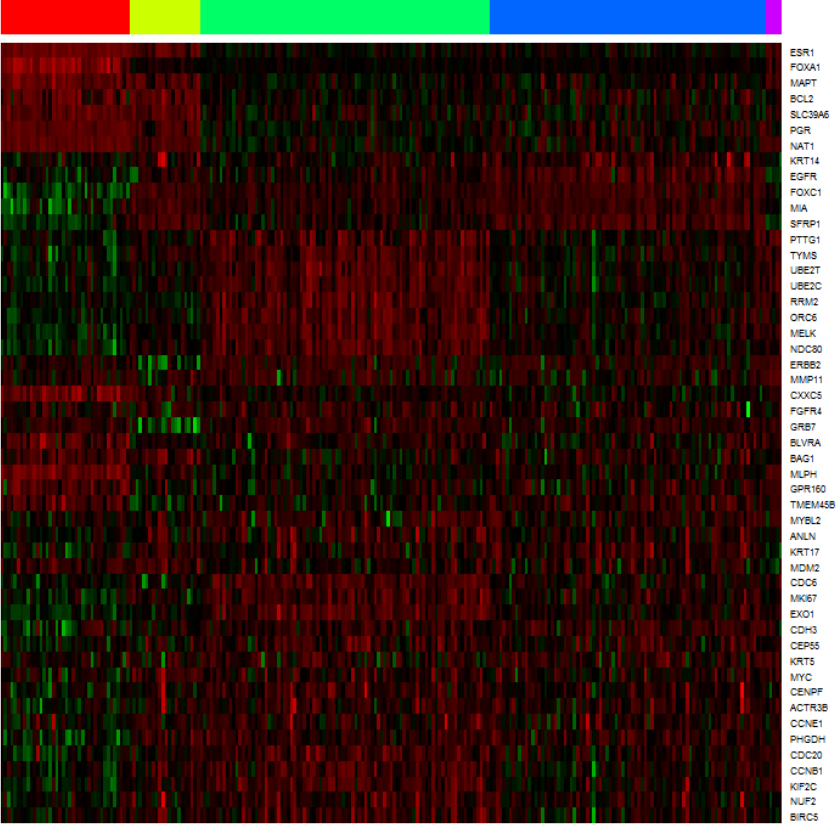

Supplement: 651751.f1.pdf [file 651751.f1.pdf]
